# Supplementary material for: Synthesis and characterization of a new aluminophosphate with a Al3P6O249− three-dimensional framework
Source: Royal Society of Chemistry journal article supplement (doi:10.1039/c3nj01484c), 2014-01-01
Supplement: c3nj01484c.pdf [file c3nj01484c.pdf]

## Supporting Information

### Synthesis and Characterization of a New Aluminophosphate with $[Al_3P_6O_{24}]^{9-}$ Three-dimensional Framework

Ying Wang,<sup>a,b</sup> Shilie Pan,<sup>\*a</sup> Shujuan Han,<sup>a</sup> Lingyun Dong,<sup>a,b</sup> Min Zhang<sup>a</sup> and Kui  
Wu<sup>a</sup>

<sup>a</sup> Key Laboratory of Functional Materials and Devices for Special Environments  
of CAS, Xinjiang Technical Institute of physics & Chemistry of CAS, Xinjiang  
Key Laboratory of Electronic Information Materials and Devices, 40–1 South  
Beijing Road, Urumqi 830011, China

<sup>b</sup> University of Chinese Academy of Sciences, Beijing 100049, China

\* To whom correspondence should be addressed

E-mail: slpan@ms.xjb.ac.cn (Shilie Pan) Tel: (86)-991-3674558 Fax:  
(86)-991-3838957

## Experimental Details

Polycrystalline samples of  $K_6Na_3Al_3P_6O_{24}$  were synthesized via solid-state reactions of the stoichiometric starting components (0.02mol) of  $NaNO_3$  (99.0%),  $KNO_3$  (99.0%),  $Al(NO_3)_3 \cdot 9H_2O$  (99.0%) and  $NH_4H_2PO_4$  (99.5%). The sample was placed in an alumina crucible and heated to 620 °C slowly in air, held for 2 d with several intermediate grindings and mixings. Purity was confirmed by powder XRD. The single crystals were grown by spontaneous crystallization from the melt of polycrystalline samples (5g). The reaction was completed in a platinum crucible under air by applying the following temperature program: heating up to 950 °C, holding at this temperature for 24 h, and then cooling slowly down to 800 °C (2 °C/h) before rapid cooling to RT. Powder XRD data were collected on a Bruker D2 PHASER diffractometer using Cu K $\alpha$  radiation ( $\lambda = 1.5418 \text{ \AA}$ ) with a step size of 0.02° and a fixed counting time of 1s/step. IR spectrum was obtained via a Shimadzu IR Affinity-1 Fourier transform infrared spectrometer in a range from 400 to 4000  $cm^{-1}$  with a resolution of 4  $cm^{-1}$ . The sample was mixed thoroughly with dried KBr (5 mg of the sample, 500 mg of KBr). The UV-Vis-NIR optical diffuse reflectance spectrum was measured with a Shimadzu SolidSpec-3700DUV spectrophotometer in the wavelength range 250-2600 nm. The reflectance spectrum was converted to absorbance with the Kubelka–Munk function.<sup>[1]</sup> Thermal analysis was carried out on NETZSCH STA 449C instrument from 50 to 1000 °C, with a heating rate of 5 °C /min in an atmosphere of flowing  $N_2$ .

### Reference

- 1 (a) P. Kubelka, F. Z. Munk, *Technol. Phys.* **1931**, *12*, 593; (b) J. Tauc, *Mater. Res. Bull.* 1970, **5**, 721.

## Structure Determination

Single crystal XRD data were collected at room temperature on a Bruker SMART APEX II CCD diffractometer with graphite-monochromatic Mo K $\alpha$  radiation ( $\lambda = 0.71073 \text{ \AA}$ ) at 293(2) K. The reduction of data was carried out with the Bruker Suite software package.<sup>[1]</sup> A face-indexed absorption correction was performed with the SADABS program and integrated with the SAINT program.<sup>[2]</sup> The structure was solved with SHELXS-97 by direct methods.<sup>[3]</sup> During the refinement, two oxygen atoms, O(5) and O(6)) behave strongly anisotropically, and each of them may be split into two partial-occupied sites (O(5A)-O(5B) and O(6A)-O(6B), respectively). To formulate the disorder, "PART" instruction and two additional free variables were used. Final least-squares refinement was on  $F_o^2$  with data having  $F_o^2 \geq 2\sigma(F_o^2)$ . The structure was checked for missing symmetry elements with PLATON.<sup>[4]</sup>

### Reference

- 1 Bruker Suite, Bruker AXS Inc., Madison, USA, 2008.
- 2 Bruker SMART, and SADABS, version 2.05, Bruker Analytical X-ray Systems, Inc., Madison, WI, 2003.
- 3 G. M. Sheldrick, *Acta Crystallogr., Sect. A: Found. Crystallogr.* 2010, **64**, 112-122.
- 4 A. L. Spek, *J. Appl. Crystallogr.* 2003, **36**, 7-13.

**Table S1.** Crystallographic Data and Structure Refinement for  $K_6Na_3Al_3P_6O_{24}$ .

|                                                           |                                                                                                                            |
|-----------------------------------------------------------|----------------------------------------------------------------------------------------------------------------------------|
| Empirical formula                                         | $K_6Na_3Al_3P_6O_{24}$                                                                                                     |
| Formula weight                                            | 954.33                                                                                                                     |
| crystal system, space group                               | Monoclinic, $P2_1/c$                                                                                                       |
| Unit cell dimensions                                      | $a = 19.9204(16) \text{ \AA}$<br>$b = 9.6139(8) \text{ \AA}$<br>$c = 13.2845(11) \text{ \AA}$<br>$\beta = 98.934(4)^\circ$ |
| Volume                                                    | $2513.3(4) \text{ \AA}^3$                                                                                                  |
| Z, Calculated density                                     | 4, 2.522 g/cm <sup>3</sup>                                                                                                 |
| Absorption coefficient                                    | $1.683 \text{ mm}^{-1}$                                                                                                    |
| F(000)                                                    | 1872                                                                                                                       |
| Crystal size                                              | $0.22 \times 0.14 \times 0.09 \text{ mm}^3$                                                                                |
| Theta range for data collection                           | 1.03 to $24.99^\circ$                                                                                                      |
| Limiting indices                                          | $-23 \leq h \leq 23$ , $-11 \leq k \leq 11$ , $-15 \leq l \leq 15$                                                         |
| Reflections collected / unique                            | 39102 / 4430 [R(int) = 0.0341]                                                                                             |
| Completeness to theta = 24.99                             | 100.0 %                                                                                                                    |
| Absorption correction                                     | Numerical                                                                                                                  |
| Max. and min. transmission                                | 0.8605 and 0.7084                                                                                                          |
| Refinement method                                         | Full-matrix least-squares on $F^2$                                                                                         |
| Data / restraints / parameters                            | 4430 / 12 / 399                                                                                                            |
| Goodness-of-fit on $F^2$                                  | 1.047                                                                                                                      |
| Final R indices [ $F_o^2 > 2\sigma(F_o^2)$ ] <sup>a</sup> | R1 = 0.0370, wR2 = 0.1033                                                                                                  |
| R indices (all data) <sup>a</sup>                         | R1 = 0.0431, wR2 = 0.1076                                                                                                  |
| Largest diff. peak and hole                               | 0.817 and $-1.495 \text{ e} \cdot \text{\AA}^{-3}$                                                                         |

<sup>a</sup>  $R_1 = \sum ||F_o| - |F_c|| / \sum |F_o|$  and  $wR_2 = [\sum w(F_o^2 - F_c^2)^2 / \sum w F_o^4]^{1/2}$  for  $F_o^2 > 2\sigma(F_o^2)$ .

**Table S2.** Atomic Coordinates and Equivalent Isotropic Displacement Parameters For  $\text{K}_6\text{Na}_3\text{Al}_3\text{P}_6\text{O}_{24}$ .  $U_{\text{eq}}$  is defined as one-third of the trace of the orthogonalized  $U_{ij}$  tensor.

| atom  | Wyck. | S.O.F. | $x/a$        | $y/b$       | $z/c$       | $U_{\text{eq}}$ |
|-------|-------|--------|--------------|-------------|-------------|-----------------|
| Na(1) | 4e    | 1      | 0.26906(7)   | 0.55797(15) | 0.35713(11) | 0.024(1)        |
| Na(2) | 4e    | 1      | 0.42086(7)   | 0.96744(15) | 0.18782(11) | 0.023(1)        |
| Na(3) | 4e    | 1      | 0.06685(7)   | 0.43333(15) | 0.31870(11) | 0.023(1)        |
| K(1)  | 4e    | 1      | 0.05460(5)   | 0.16634(10) | 0.08008(7)  | 0.032(1)        |
| K(2)  | 4e    | 1      | 0.20005(5)   | 0.18444(9)  | 0.40232(7)  | 0.031(1)        |
| K(3)  | 4e    | 1      | 0.28702(4)   | 0.66646(9)  | 0.08147(7)  | 0.030(1)        |
| K(4)  | 4e    | 1      | 0.44934(5)   | 0.81613(9)  | -0.09782(7) | 0.031(1)        |
| K(5)  | 4e    | 1      | 0.13566(5)   | 0.81379(10) | 0.27746(7)  | 0.030(1)        |
| K(6)  | 4e    | 1      | 0.39566(6)   | 0.34089(14) | 0.24559(9)  | 0.053(1)        |
| Al(1) | 4e    | 1      | 0.40312(5)   | 0.43237(11) | -0.04789(8) | 0.016(1)        |
| Al(2) | 4e    | 1      | 0.24234(5)   | 0.07465(10) | 0.11809(8)  | 0.016(1)        |
| Al(3) | 4e    | 1      | 0.10240(5)   | 0.56523(11) | 0.05686(8)  | 0.015(1)        |
| P(1)  | 4e    | 1      | 0.03304(4)   | 0.06753(9)  | 0.35518(7)  | 0.015(1)        |
| P(2)  | 4e    | 1      | 0.35613(5)   | 0.15033(10) | -0.00432(8) | 0.023(1)        |
| P(3)  | 4e    | 1      | 0.20751(5)   | 0.37795(9)  | 0.18467(7)  | 0.016(1)        |
| P(4)  | 4e    | 1      | 0.45866(5)   | 0.61859(10) | 0.12810(7)  | 0.019(1)        |
| P(5)  | 4e    | 1      | 0.14315(5)   | 0.86253(10) | 0.00763(7)  | 0.019(1)        |
| P(6)  | 4e    | 1      | 0.30381(5)   | 0.90378(10) | 0.30507(7)  | 0.020(1)        |
| O(1)  | 4e    | 1      | -0.04376(13) | 0.0437(3)   | 0.3609(2)   | 0.032(1)        |
| O(2)  | 4e    | 1      | 0.07052(14)  | -0.0437(3)  | 0.42915(19) | 0.026(1)        |
| O(3)  | 4e    | 1      | 0.04320(13)  | 0.0281(3)   | 0.24934(19) | 0.025(1)        |
| O(4)  | 4e    | 1      | 0.05575(15)  | 0.2106(3)   | 0.3906(2)   | 0.033(1)        |
| O(5A) | 4e    | 0.88   | 0.17321(18)  | 0.4090(5)   | 0.2759(3)   | 0.030(2)        |
| O(6A) | 4e    | 0.81   | 0.2095(2)    | 0.2192(4)   | 0.1738(6)   | 0.037(2)        |
| O(5B) | 4e    | 0.12   | 0.1571(16)   | 0.338(4)    | 0.250(3)    | 0.036(9)        |
| O(6B) | 4e    | 0.19   | 0.2089(9)    | 0.2333(19)  | 0.118(3)    | 0.031(6)        |
| O(7)  | 4e    | 1      | 0.28140(13)  | 0.1154(3)   | 0.0138(2)   | 0.032(1)        |
| O(8)  | 4e    | 1      | 0.37682(16)  | 0.0431(3)   | -0.0749(3)  | 0.048(1)        |
| O(9)  | 4e    | 1      | 0.34690(12)  | 0.2932(3)   | -0.0605(2)  | 0.022(1)        |
| O(10) | 4e    | 1      | 0.40293(15)  | 0.1666(3)   | 0.0947(2)   | 0.044(1)        |
| O(11) | 4e    | 1      | 0.16462(14)  | 0.4383(3)   | 0.0864(2)   | 0.035(1)        |
| O(12) | 4e    | 1      | 0.27734(14)  | 0.4374(3)   | 0.1963(2)   | 0.036(1)        |
| O(13) | 4e    | 1      | 0.30316(17)  | 0.7514(3)   | 0.2843(2)   | 0.041(1)        |
| O(14) | 4e    | 1      | 0.13480(14)  | 0.7322(3)   | 0.0765(2)   | 0.029(1)        |
| O(15) | 4e    | 1      | 0.07619(15)  | 0.9071(3)   | -0.0485(3)  | 0.045(1)        |
| O(16) | 4e    | 1      | 0.16901(14)  | 0.9772(3)   | 0.0872(2)   | 0.032(1)        |
| O(17) | 4e    | 1      | 0.25123(14)  | 0.9558(3)   | 0.3641(2)   | 0.034(1)        |
| O(18) | 4e    | 1      | 0.19662(17)  | 0.8300(3)   | -0.0549(3)  | 0.043(1)        |
| O(19) | 4e    | 1      | 0.30033(15)  | 0.9825(4)   | 0.2014(2)   | 0.048(1)        |

|       |    |   |             |           |           |          |
|-------|----|---|-------------|-----------|-----------|----------|
| O(20) | 4e | 1 | 0.37731(13) | 0.9442(3) | 0.3583(2) | 0.028(1) |
| O21   | 4e | 1 | 0.42291(17) | 0.7570(3) | 0.1212(3) | 0.053(1) |
| O22   | 4e | 1 | 0.51858(13) | 0.6312(3) | 0.0652(2) | 0.026(1) |
| O23   | 4e | 1 | 0.48177(15) | 0.5629(4) | 0.2315(2) | 0.051(1) |
| O24   | 4e | 1 | 0.40852(13) | 0.5107(3) | 0.0701(2) | 0.028(1) |

---

**Table S3.** Selected Bond Distances (Å) for  $K_6Na_3Al_3P_6O_{24}$ .

|                           |          |                            |          |
|---------------------------|----------|----------------------------|----------|
| Na(1)-O(13)               | 2.250(3) | K(5)-O(18) <sup>#1</sup>   | 2.740(3) |
| Na(1)-O(18) <sup>#1</sup> | 2.266(3) | K(5)-O(3) <sup>#4</sup>    | 2.750(3) |
| Na(1)-O(8) <sup>#2</sup>  | 2.401(4) | K(5)-O(17)                 | 2.769(3) |
| Na(1)-O(12)               | 2.459(3) | K(5)-O(14)                 | 2.780(3) |
| Na(1)-O(5A)               | 2.494(5) | K(5)-O(2) <sup>#4</sup>    | 2.904(3) |
| Na(1)-O(7) <sup>#2</sup>  | 2.648(3) | K(5)-O(16)                 | 3.133(3) |
| mean                      | 2.420    | K(5)-O(13)                 | 3.377(4) |
| Na(2)-O(21)               | 2.211(3) | mean                       | 2.922    |
| Na(2)-O(23) <sup>#3</sup> | 2.260(3) | K(6)-O(12)                 | 2.523(3) |
| Na(2)-O(10) <sup>#4</sup> | 2.277(3) | K(6)-O(10)                 | 2.634(4) |
| Na(2)-O(19)               | 2.440(3) | K(6)-O(8) <sup>#2</sup>    | 2.711(4) |
| Na(2)-O(20)               | 2.557(3) | K(6)-O(23)                 | 2.763(4) |
| mean                      | 2.349    | K(6)-O(24)                 | 2.890(3) |
|                           |          | K(6)-O(9) <sup>#2</sup>    | 3.165(3) |
| Na(3)-O(5A)               | 2.289(3) | mean                       | 2.781    |
| Na(3)-O(15) <sup>#1</sup> | 2.323(3) | Al(1)-O(22) <sup>#10</sup> | 1.723(3) |
| Na(3)-O(5B)               | 2.330(3) | Al(1)-O(24)                | 1.727(3) |
| Na(3)-O(4)                | 2.369(3) | Al(1)-O(9)                 | 1.736(3) |
| Na(3)-O(3) <sup>#5</sup>  | 2.416(3) | Al(1)-O(20) <sup>#9</sup>  | 1.740(3) |
| Na(3)-O(1) <sup>#5</sup>  | 2.586(3) | mean                       | 1.732    |
| mean                      | 2.386    | Al(2)-O(6B)                | 1.665(2) |
|                           |          | Al(2)-O(19) <sup>#8</sup>  | 1.717(3) |
| K(1)-O(3)                 | 2.652(3) | Al(2)-O(16) <sup>#8</sup>  | 1.730(3) |
| K(1)-O(15) <sup>#6</sup>  | 2.669(3) | Al(2)-O(7)                 | 1.735(3) |
| K(1)-O(4) <sup>#7</sup>   | 2.785(3) | Al(2)-O(6A)                | 1.749(4) |
| K(1)-O(16) <sup>#8</sup>  | 2.906(3) | mean                       | 1.719    |
| K(1)-O(15) <sup>#8</sup>  | 3.089(4) | Al(3)-O(2) <sup>#7</sup>   | 1.729(3) |
| K(1)-O(6B)                | 3.103(2) | Al(3)-O(1) <sup>#5</sup>   | 1.731(3) |
| K(1)-O(6A)                | 3.183(5) | Al(3)-O(14)                | 1.735(3) |
| K(1)-O(5B)                | 3.250(4) | Al(3)-O(11)                | 1.740(3) |
| K(1)-O(11)                | 3.404(3) | mean                       | 1.734    |
| mean                      | 3.004    | P(1)-O(3)                  | 1.500(3) |
|                           |          | P(1)-O(4)                  | 1.500(3) |
| K(2)-O(17) <sup>#8</sup>  | 2.508(3) | P(1)-O(1)                  | 1.561(3) |
| K(2)-O(5B)                | 2.540(3) | P(1)-O(2)                  | 1.562(3) |
| K(2)-O(5A)                | 2.736(4) | mean                       | 1.531    |
| K(2)-O(7) <sup>#2</sup>   | 2.789(3) | P(2)-O(8)                  | 1.494(3) |
| K(2)-O(4)                 | 2.865(3) | P(2)-O(10)                 | 1.497(3) |
| K(2)-O(9) <sup>#2</sup>   | 2.898(3) | P(2)-O(9)                  | 1.560(3) |
| K(2)-O(11) <sup>#2</sup>  | 2.900(3) | P(2)-O(7)                  | 1.581(3) |
| K(2)-O(6B) <sup>#2</sup>  | 2.960(3) | mean                       | 1.533    |
| K(2)-O(6A)                | 3.088(9) | P(3)-O(5B)                 | 1.470(3) |
| mean                      | 2.809    | P(3)-O(12)                 | 1.490(3) |

---

|                           |          |            |          |
|---------------------------|----------|------------|----------|
| K(3)-O(12)                | 2.702(3) | P(3)-O(5A) | 1.511(3) |
| K(3)-O(13)                | 2.786(3) | P(3)-O(6A) | 1.534(3) |
| K(3)-O(21)                | 2.814(3) | P(3)-O(11) | 1.557(3) |
| K(3)-O(18)                | 2.825(4) | P(3)-O(6B) | 1.605(2) |
| K(3)-O(24)                | 2.870(3) | mean       | 1.535    |
| K(3)-O(14)                | 3.088(3) | P(4)-O(23) | 1.480(3) |
| K(3)-O(17)#9              | 3.096(3) | P(4)-O(21) | 1.506(3) |
| K(3)-O(11)                | 3.288(3) | P(4)-O(24) | 1.558(3) |
| K(3)-O(19)                | 3.422(4) | P(4)-O(22) | 1.565(3) |
| mean                      | 2.988    | mean       | 1.527    |
| K(4)-O(8) <sup>#4</sup>   | 2.660(3) | P(5)-O(18) | 1.482(3) |
| K(4)-O(23) <sup>#9</sup>  | 2.714(3) | P(5)-O(15) | 1.487(3) |
| K(4)-O(20) <sup>#9</sup>  | 2.899(3) | P(5)-O(16) | 1.559(3) |
| K(4)-O(10) <sup>#10</sup> | 2.941(3) | P(5)-O(14) | 1.576(3) |
| K(4)-O(22)                | 2.971(3) | mean       | 1.526    |
| K(4)-O(21)                | 3.089(4) | P(6)-O(17) | 1.489(3) |
| K(4)-O(13) <sup>#9</sup>  | 3.152(4) | P(6)-O(13) | 1.490(3) |
| mean                      | 2.918    | P(6)-O(19) | 1.563(3) |
|                           |          | P(6)-O(20) | 1.573(3) |
|                           |          | mean       | 1.529    |

---

Symmetry transformations used to generate equivalent atoms:

<sup>#1</sup>  $x, -y+3/2, z+1/2$ ; <sup>#2</sup>  $x, -y+1/2, z+1/2$ ; <sup>#3</sup>  $-x+1, y+1/2, -z+1/2$ ; <sup>#4</sup>  $x, y+1, z$ ; <sup>#5</sup>  $-x, y+1/2, -z+1/2$ ;  
<sup>#6</sup>  $-x, -y+1, -z$ ; <sup>#7</sup>  $x, -y+1/2, z-1/2$ ; <sup>#8</sup>  $x, y-1, z$ ; <sup>#9</sup>  $x, -y+3/2, z-1/2$ ; <sup>#10</sup>  $-x+1, -y+1, -z$



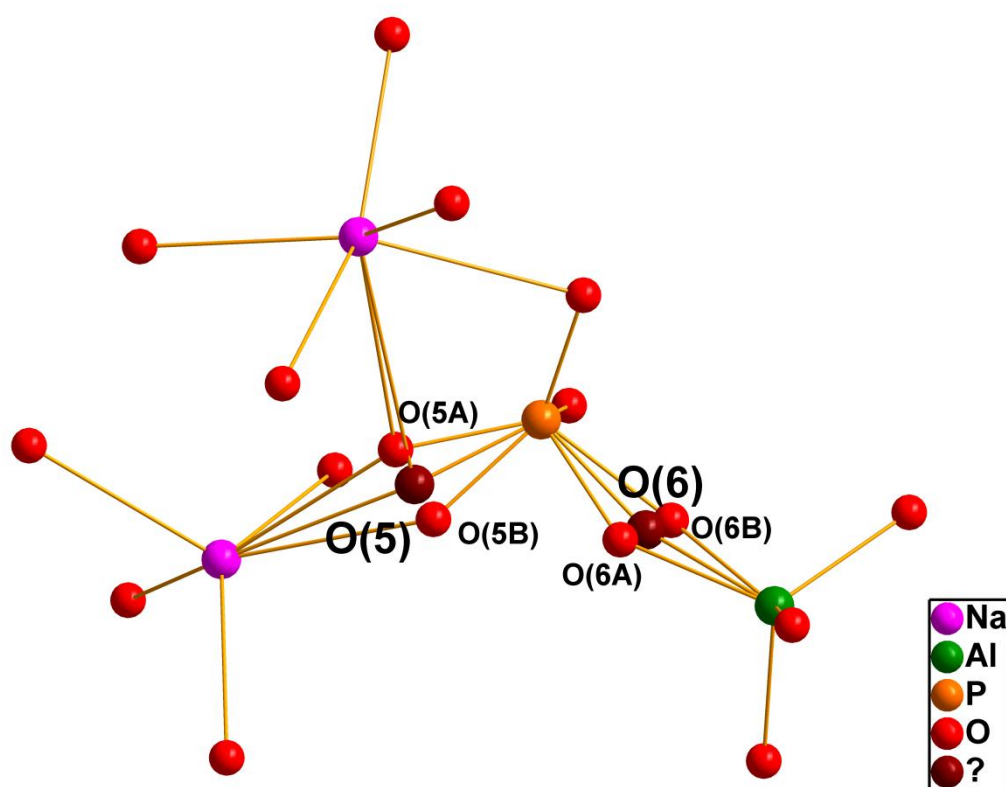

**Figure S1.** The simplification for the disorder oxygen atoms in  $K_6Na_3Al_3P_6O_{24}$  (The dark red atoms stand for the pseudo-atoms, and their position are determined by the average positions between the disorder oxygen atoms).

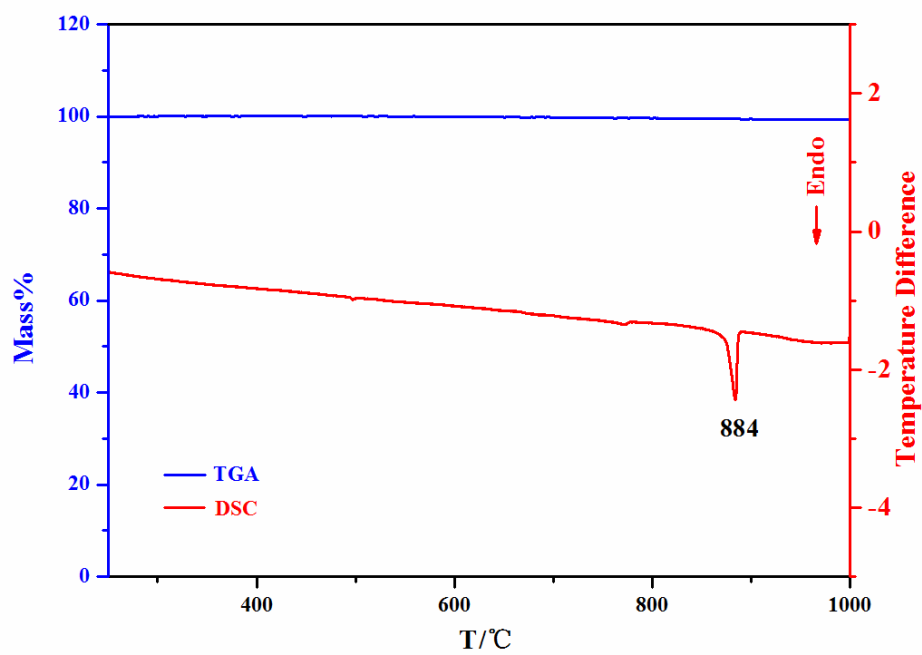

**Figure S2.** TGA and DSC curves for  $K_6Na_3Al_3P_6O_{24}$ .

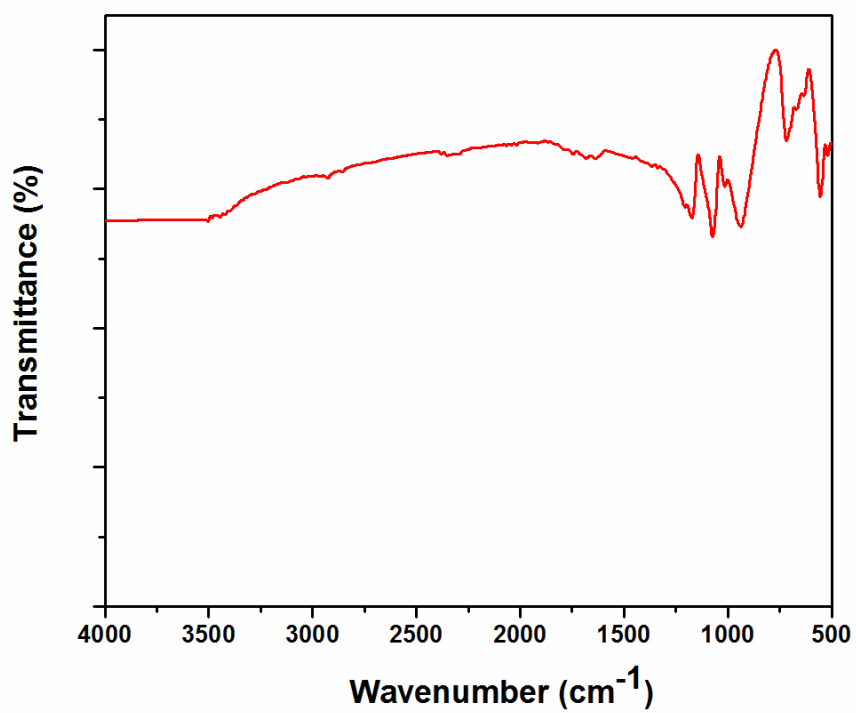

**Figure S3.** IR Spectroscopy of as-synthesized  $\text{K}_6\text{Na}_3\text{Al}_3\text{P}_6\text{O}_{24}$ .

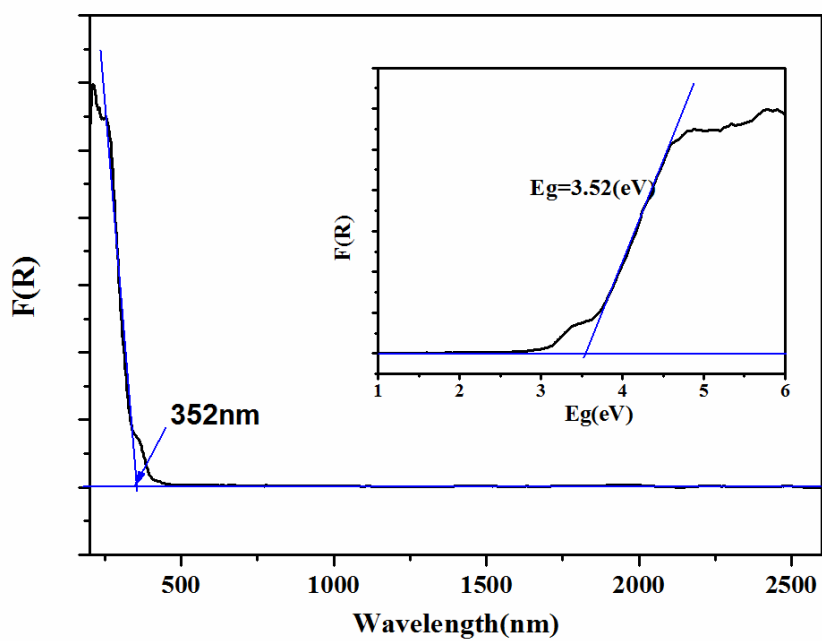

**Figure S4.** UV-Vis-NIR diffuse-reflectance spectroscopy of

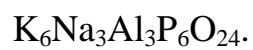

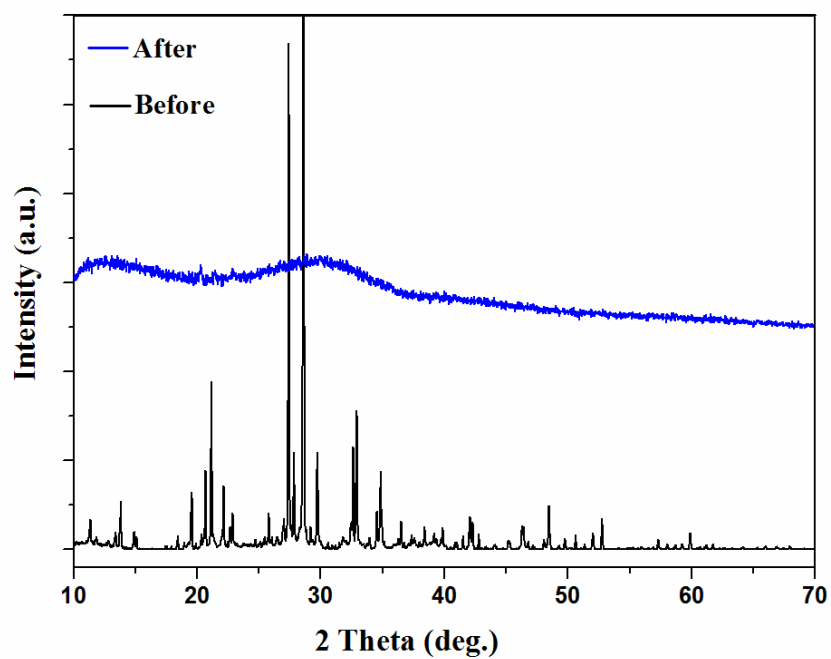

**Figure S5.** The powder XRD patterns of  $K_6Na_3Al_3P_6O_{24}$  before and after ion-exchange experiment (in 1M  $NaNO_3$  solution for illustration).
